# Supplementary material for: Exchange dynamics between amphiphilic block copolymers and lipidic membranes through hydrophobic pyrene probe transfer
Source: Royal Society of Chemistry journal article supplement (doi:10.1039/c8ra08903e), 2018-01-01
Supplement: c8ra08903e1.pdf [file c8ra08903e1.pdf]

## Electronic supplementary information

### Exchange Dynamics Between Amphiphilic Block Copolymers and Lipidic Membranes through Hydrophobic Pyrene Probe Transfer

*Lourdes Mónica Bravo-Anaya<sup>†‡§\*</sup>, G. Landazuri<sup>§</sup>, E. Figueroa-Ochoa<sup>||</sup>, Francisco Carvajal Ramos<sup>3</sup>, J. Félix Armando Soltero Martínez<sup>§</sup>, Yahya Rharbi<sup>†‡</sup>*

<sup>†</sup> Univ. Grenoble Alpes, LRP, F-38000 Grenoble (France).

<sup>‡</sup> CNRS, LRP, F-38000 Grenoble (France).

<sup>§</sup> Universidad de Guadalajara, Departamento de Ingeniería Química. Blvd. M. García Barragán #1451, C.P. 44430, Guadalajara, Jalisco (México).

<sup>||</sup> Universidad de Guadalajara, Departamento de Química. Blvd. M. García Barragán #1451, C.P. 44430, Guadalajara, Jalisco (México).

<sup>3</sup> Universidad de Guadalajara, CUTonalá, Departamento de Ingenierías, Nuevo Periférico #555 Ejido San José Tatepozco, C.P. 45425, Tonalá, Jalisco (México)

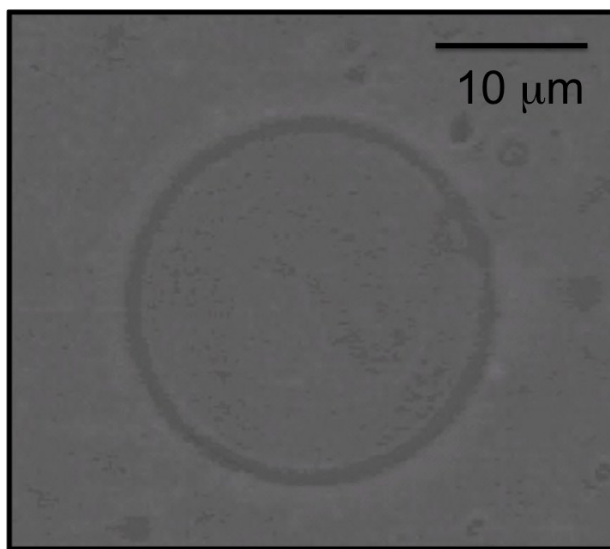

**S.1.** Confocal observations of a GUV in water at a concentration of 2 mg/mL, with a  $\zeta$ -potential of around -26 mV, a diameter of around 30  $\mu\text{m}$  and a pH of 6.5.

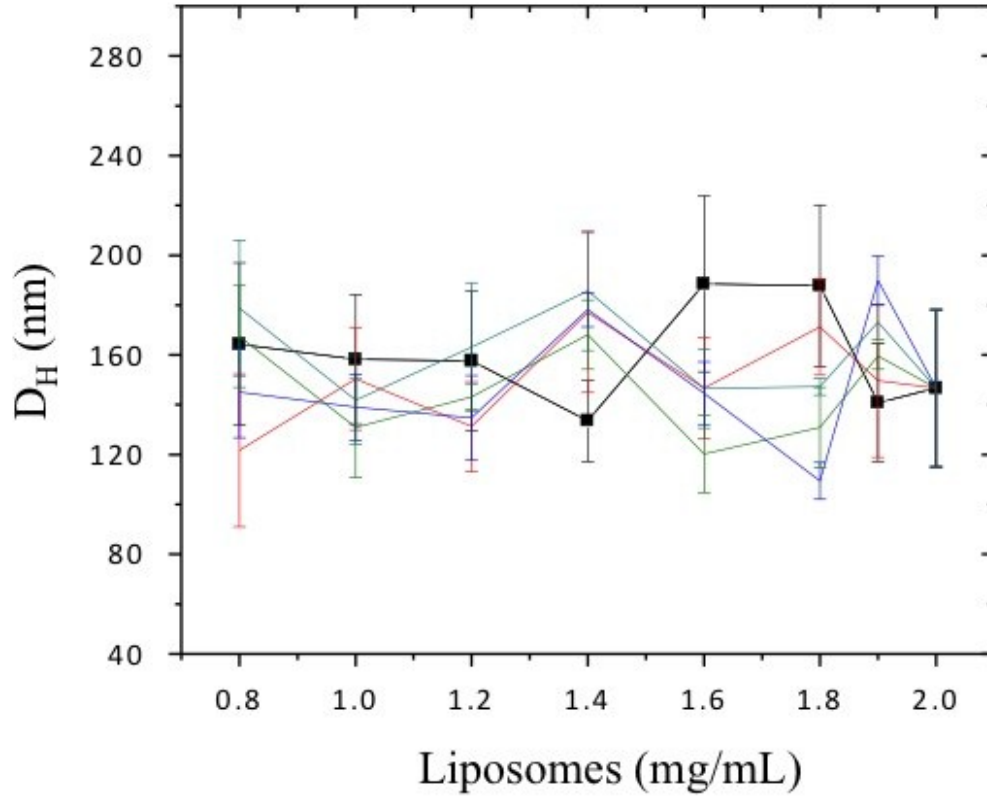

**S.2.**  $D_H$  variation with the liposomes concentration, measured at a constant temperature of 37 °C and a pH=6.5. P104 concentrations: 0.5 mg/mL (black line), 1 mg/mL (red line), 2 mg/mL (dark green line), 3 mg/mL (light green line), 4 mg/mL (blue line) and 5 mg/mL (purple line).
